# Supplementary material
Source: publisher figshare collection journal article supplement (https://springernature.figshare.com/ndownloader/files/7203317)
Supplement: Supplementary file [file 7203317]

### ***Antiplatelet antibodies measurement.***

**Canine antiplatelet antibodies (aPLT) measurement by indirect ELISAs.** For the examination of aPLT in serum samples, an indirect ELISA was carried out according to the manual of the canine PA-IgG/M/A ELISA kit (Novatein Biosciences, Woburn, MA, USA). Briefly, 50  $\mu$ L of diluted canine serum samples (diluted with sample diluent) were added into each of 96 wells. One hundred  $\mu$ L of HRP-conjugated antibody specific for dog IgG/IgM/IgA were mixed into each well and incubated at 37 °C for 1 hour each well. After five washes, 50  $\mu$ L of chromogen A and 50  $\mu$ L of chromogen B solution were added and incubated for 15 min at 37 °C in the dark. Finally, 50  $\mu$ L of stop solution was added and the optical density (OD) was measured at 450 nm by using a  $\mu$ quant ELISA reader (BioTek). Positive threshold for aPLT was determined as mean plus 2.33 SD (99<sup>th</sup> percentile cut-off value) of 10 healthy dogs (Group III of this study). For quantification, 6 pre-diluted standards (0.5 to 16 ng/mL in 50  $\mu$ L) provided in the kit were used for calibration. A standard ELISA curve, with an R squared value of 0.9949, was generated by using linear regression. This standard equation, concentration (ng/mL) =  $9.4117 \times OD - 0.624$ , was applied to deduce aPLT concentrations in canine sera.

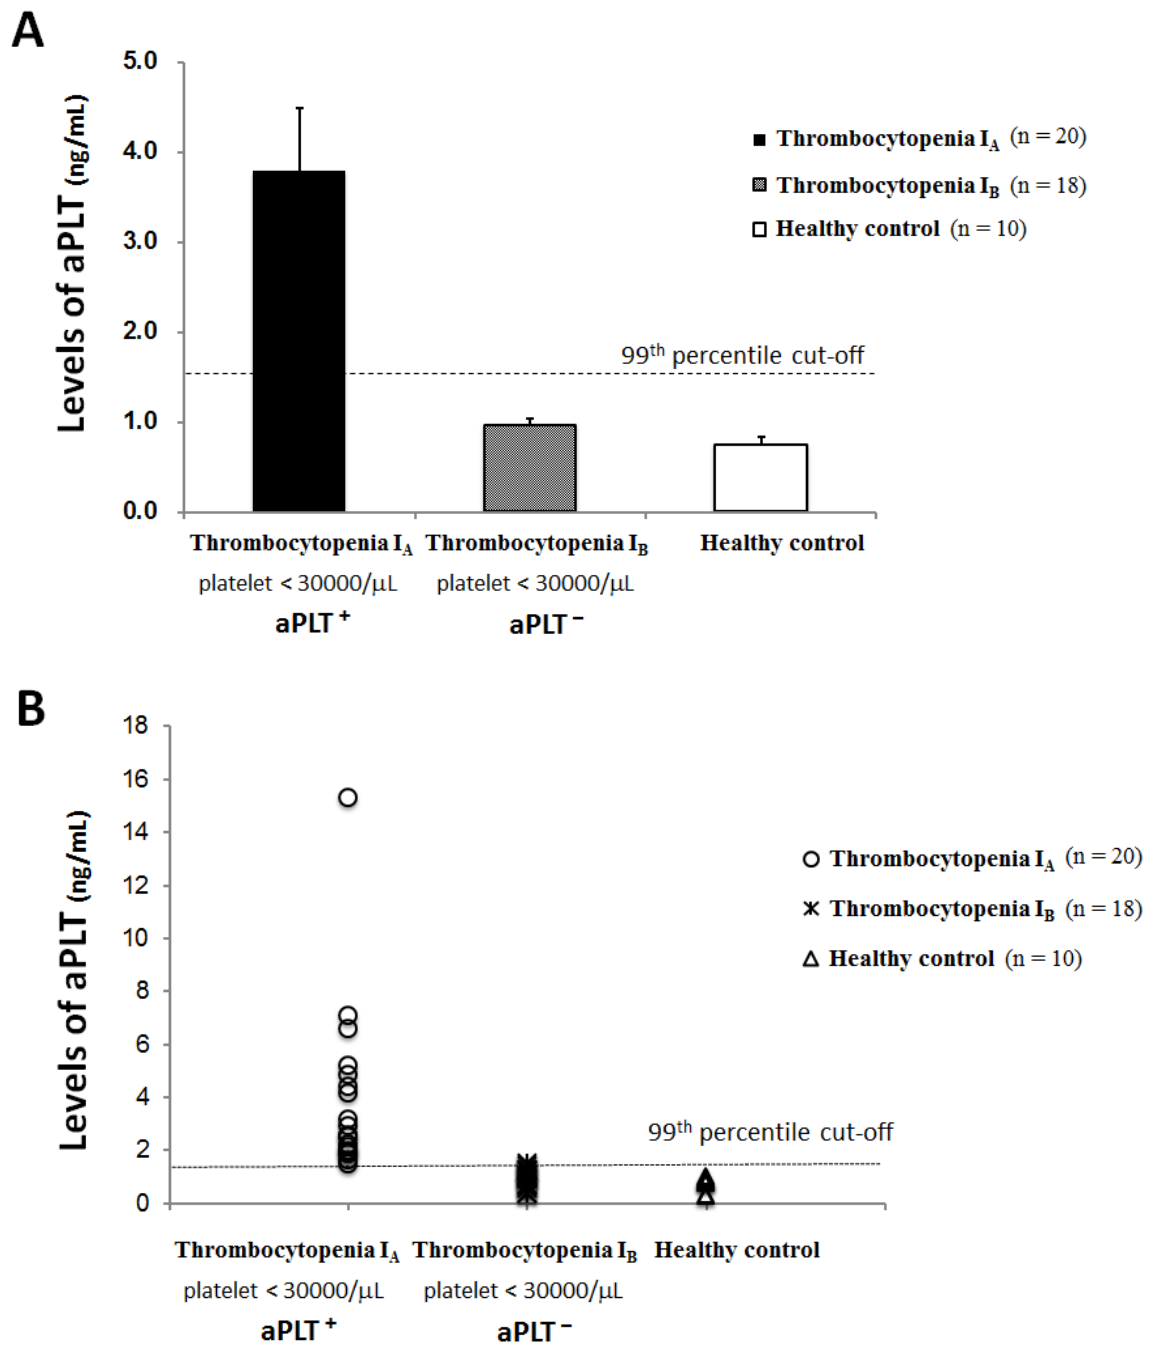

**Levels of antiplatelet antibodies (aPLT).** Based on a 99<sup>th</sup> percentile cut-off value, severe thrombocytopenic dogs with platelet count < 30000/ $\mu$ L were divided into I<sub>A</sub> (aPLT<sup>+</sup>) and I<sub>B</sub> (aPLT<sup>-</sup>) subgroups. In panel A, average levels of aPLT in subgroup I<sub>A</sub> (severe thrombocytopenia with positive aPLT), subgroup I<sub>B</sub> (severe thrombocytopenia with negative aPLT), and healthy dogs were presented as means  $\pm$  standard error (SE). In panel B, aPLT levels of individual dogs in subgroup I<sub>A</sub>, subgroup I<sub>B</sub>, and healthy dogs were presented.
